# Supplementary material
Source: publisher figshare collection journal article supplement (https://gsajournals.figshare.com/ndownloader/files/18045098)
Supplement: Supplementary file 1 [file 18045098]

## Sheet: Table S5
Table S5: NCOGCs recovered in this study.
Maternal Genotype	Chr	Stock	Parent Converted From	Parent Converted To	Last non-converted SNP	First Converted SNP	Last Converted SNP	Total SNPs in NCOGC	First non-converted SNP	Max NCOGC Tract Length	Gap on left	Gap on right	Min NCOGC Tract Length
c(3)G68/+	chrX	c3g-het-7.20	Canton-S	w1118	2681904	2682159	2683322	13	2683363	1459	255	41	1163
c(3)G68/+	chrX	c3g-het-3.08	Canton-S	w1118	2708883	2708945	2709176	8	2709521	638	62	345	231
c(3)G68/+	chrX	c3g-het-7.14	Canton-S	w1118	5439703	5440141	5441033	2	5441593	1890	438	560	892
c(3)G68/+	chrX	c3g-het-7.20	Canton-S	w1118	5505877	5505893	5505905	2	5505999	122	16	94	12
c(3)G68/+	chrX	c3g-het-7.18	Canton-S	w1118	8445896	8446986	8448225	7	8448515	2619	1090	290	1239
c(3)G68/+	chrX	c3g-het-3.11	Canton-S	w1118	8646893	8647513	8647513	1	8647652	759	620	139	0
c(3)G68/+	chrX	c3g-het-3.05	Canton-S	w1118	8969063	8970030	8971100	9	8971493	2430	967	393	1070
c(3)G68/+	chrX	c3g-het-7.05	Canton-S	w1118	8985349	8986431	8986431	1	8988683	3334	1082	2252	0
c(3)G68/+	chrX	c3g-het-7.08	w1118	Canton-S	9197623	9197686	9198007	2	9198319	696	63	312	321
c(3)G68/+	chrX	c3g-het-3.11	Canton-S	w1118	14530037	14530470	14531203	8	14531523	1486	433	320	733
c(3)G68/+	chr2L	c3g-het-7.19	Canton-S/w1118	w1118	2714821	2715643	2716071	5	2716717	1896	822	646	428
c(3)G68/+	chr2L	c3g-het-3.09	Canton-S/w1118	w1118	2863597	2866826	2867282	9	2867448	3851	3229	166	456
c(3)G68/+	chr2L	c3g-het-3.01	w1118	Canton-S/w1118	5271712	5272479	5272780	2	5274225	2513	767	1445	301
c(3)G68/+	chr2L	c3g-het-7.15	Canton-S/w1118	w1118	9718666	9718871	9719802	1	9720048	1382	205	246	931
c(3)G68/+	chr2L	c3g-het-3.04	w1118	Canton-S/w1118	10166859	10167163	10168610	3	10169175	2316	304	565	1447
c(3)G68/+	chr2L	c3g-het-7.11	w1118	Canton-S/w1118	13186679	13187412	13187444	2	13187839	1160	733	395	32
c(3)G68/+	chr2L	c3g-het-3.15	Canton-S/w1118	w1118	13592350	13592624	13593843	7	13594733	2383	274	890	1219
c(3)G68/+	chr2L	c3g-het-3.17	Canton-S/w1118	w1118	16696094	16696316	16696886	2	16697040	946	222	154	570
c(3)G68/+	chr2L	c3g-het-3.19	Canton-S/w1118	w1118	16988901	16989271	16990069	6	16990195	1294	370	126	798
c(3)G68/+	chr2L	c3g-het-3.14	w1118	Canton-S/w1118	20406051	20406564	20406564	1	20407272	1221	513	708	0
c(3)G68/+	chr2L	c3g-het-7.12	w1118	Canton-S/w1118	22986477	23017781	23017781	1	23023485	37008	31304	5704	0
c(3)G68/+	chr2R	c3g-het-7.18	Canton-S/w1118	w1118	5237887	5238317	5238323	2	5239828	1941	430	1505	6
c(3)G68/+	chr2R	c3g-het-7.05	Canton-S/w1118	w1118	5718423	5718969	5718969	1	5721103	2680	546	2134	0
c(3)G68/+	chr2R	c3g-het-3.14	w1118	Canton-S/w1118	6684126	6684323	6685041	4	6685756	1630	197	715	718
c(3)G68/+	chr2R	c3g-het-7.14	w1118	Canton-S/w1118	8611539	8611696	8611367	2	8612192	653	157	825	-329
c(3)G68/+	chr2R	c3g-het-3.15	Canton-S/w1118	w1118	9789180	9789700	9790006	2	9791154	1974	520	1148	306
c(3)G68/+	chr2R	c3g-het-3.06	w1118	Canton-S/w1118	11003198	11003707	11003922	6	11004214	1016	509	292	215
c(3)G68/+	chr2R	c3g-het-3.20	w1118	Canton-S/w1118	12034629	12034838	12034980	8	12035123	494	209	143	142
c(3)G68/+	chr2R	c3g-het-3.20	w1118	Canton-S/w1118	14924303	14924723	14925711	14	14926147	1844	420	436	988
c(3)G68/+	chr2R	c3g-het-3.11	w1118	Canton-S/w1118	18409016	18409384	18410202	11	18410339	1323	368	137	818
c(3)G68/+	chr2R	c3g-het-3.16	Canton-S/w1118	w1118	19531893	19532309	19532787	8	19532869	976	416	82	478
c(3)G68/+	chr2R	c3g-het-7.20	w1118	Canton-S/w1118	23499385	23499538	23499597	4	23499893	508	153	296	59
c(3)G68/c(3)G68	chr2R	c3g6.4	Canton-S/w1118	w1118	23348782	23350969	23351148	2	23351654	2872	2187	506	179
